# Supplementary material
Source: Springer Nature journal article supplement (https://www.springerprofessional.de/resource/supplementary/13638_2013_991_MOESM2_ESM.pdf/11898964)

forward direction

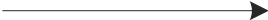

$d_f$

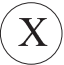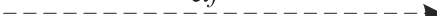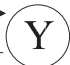

$d_r$

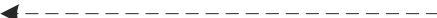

Supplement: MOESM2 [file 11898964]
